# Supplementary material for: When public health crises collide: 5 years of pediatric firearm injury prevention opportunities
Source: HighWire-hosted journal article supplement (doi:10.1136/tsaco-2022-001026), 2023-03-01

When Public-Health Crises Collide: A Multicenter Examination of Pediatric Firearm-Related Injury Prevention Opportunities During the Pandemic

Author et al.  
Trauma Surgery and Acute Care Open  
Month Year

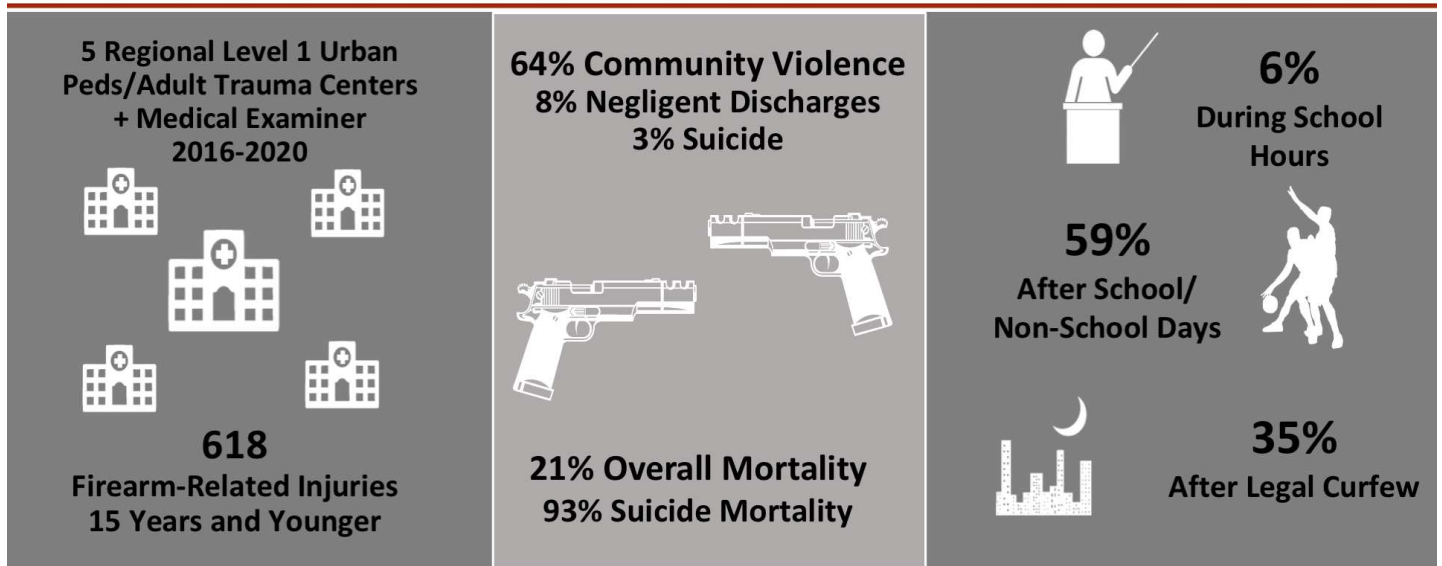

TRAUMA SURGERY & ACUTE CARE OPEN

 @TSACO\_AAST

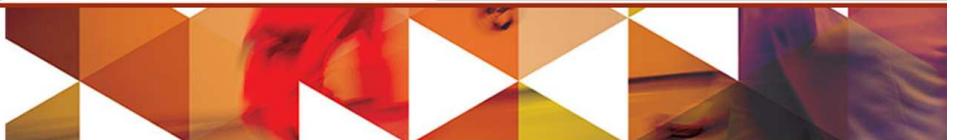

Supplement: tsaco-2022-001026supp001_data_supplement.pdf [file tsaco-2022-001026supp001_data_supplement.pdf]
